# Supplementary material for: Willingness to purchase institutionalised elderly services and influencing factors among Chinese older adults: a nationwide cross-sectional study
Source: HighWire-hosted journal article supplement (doi:10.1136/bmjopen-2023-082548), 2024-03-01
Supplement: bmjopen-2023-082548supp001_data_supplement.pdf [file bmjopen-2023-082548supp001_data_supplement.pdf]

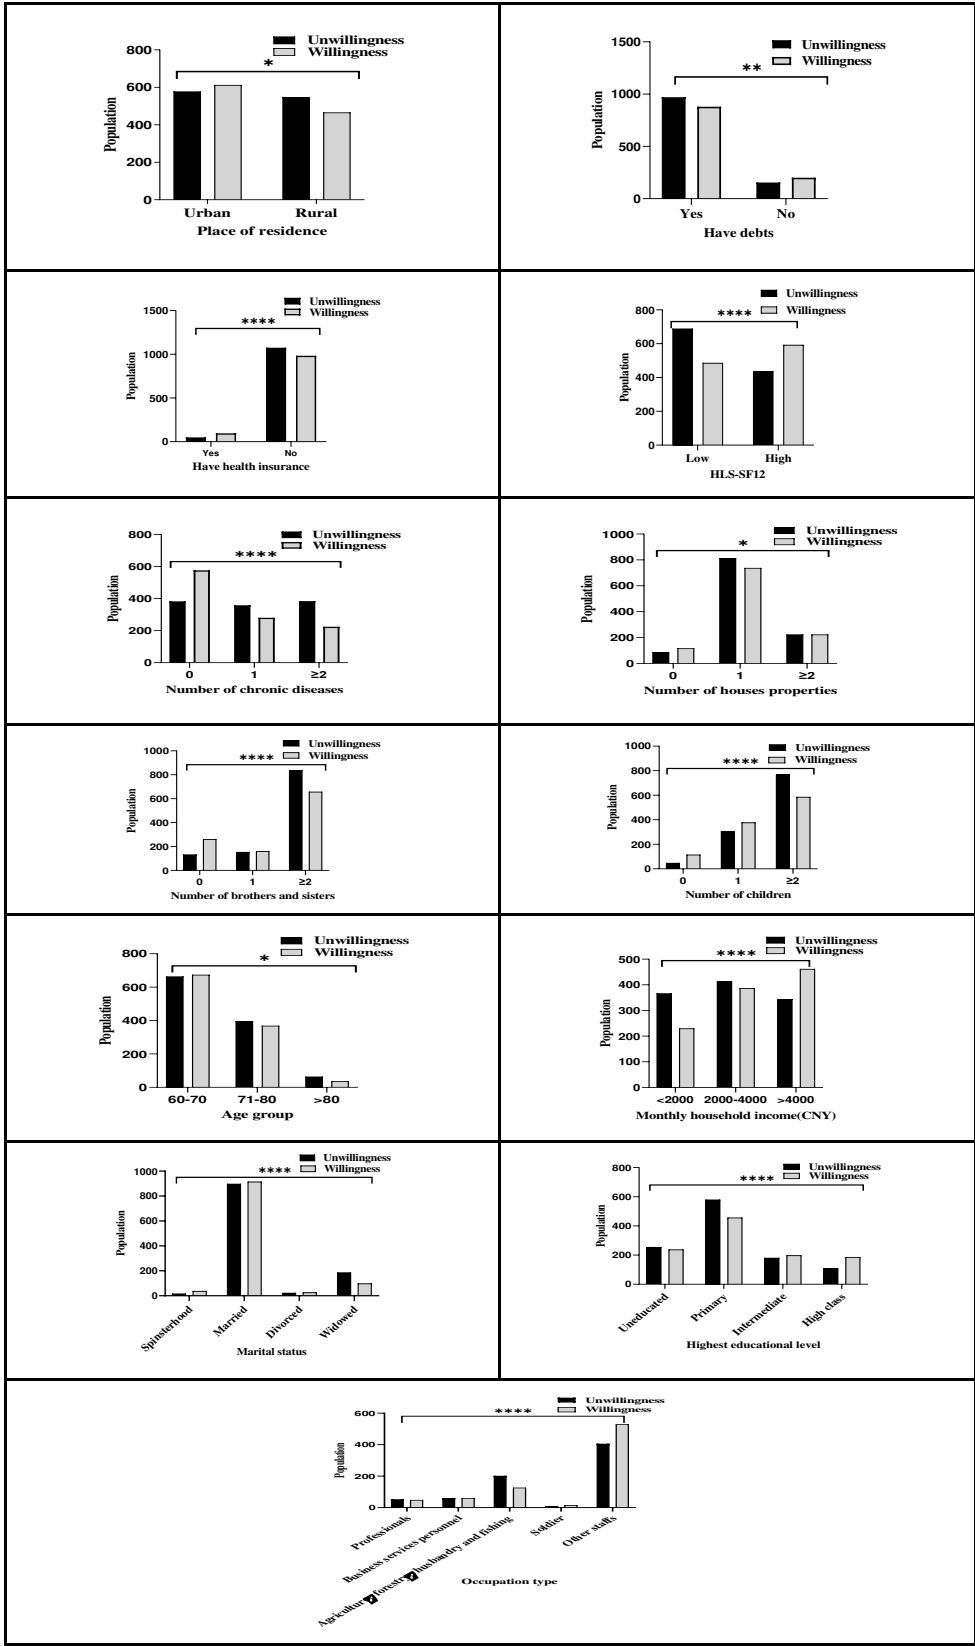

**supplementary figure 1.** Univariate (chi-square) analysis of the "reluctance-reluctance" attitude of older adults towards purchasing institutionalized elderly care services (\*\*\*\*P<0.0001, \*\*\*P<0.001, \*\*p<0.01, \*p<0.05)

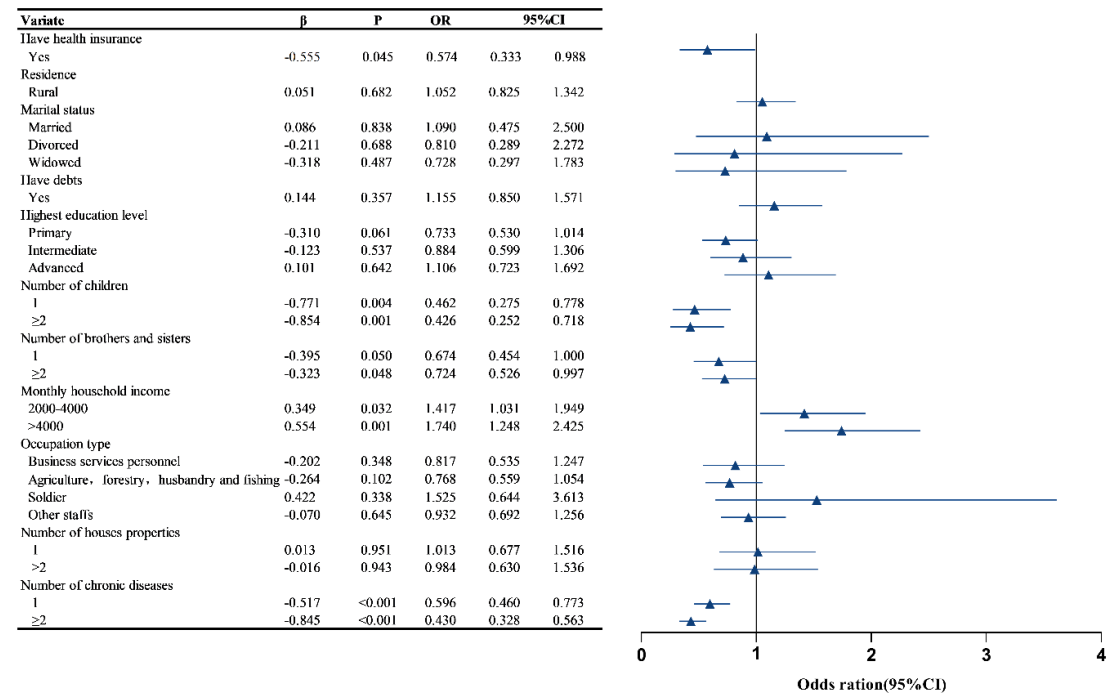

**supplementary figure 2.** Results of regression analysis of “reluctance – willingness” of older adults to purchase institutional care services

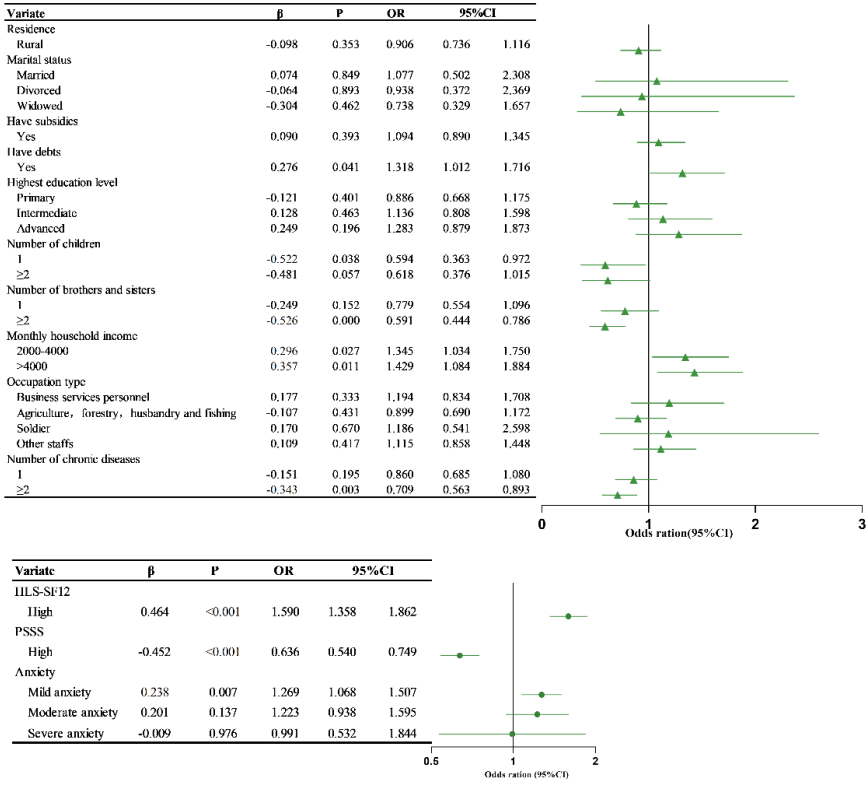

**supplementary figure 3.** Results of regression analysis of the “reluctance-hesitation” attitude of older adults in purchasing institutionalized elderly care services

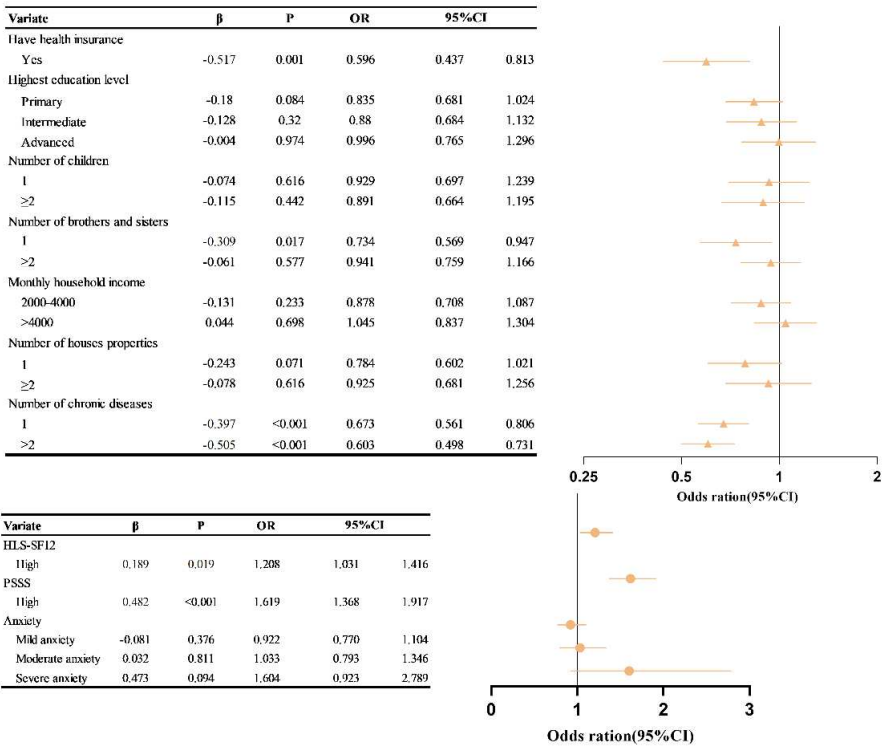

**supplementary figure 4.** Results of regression analysis of “hesitant-willing” attitude of older adults towards purchasing institutionalized elderly care services
